# Supplementary figures and images for: Risk factors associated with acute kidney injury in a cohort of 20,575 arthroplasty patients
Source: PubMed Central journal article supplement — Acta Orthop. 2017 Mar 15;88(4):370–6. doi: 10.1080/17453674.2017.1301743 (PMC5499326; doi:10.1080/17453674.2017.1301743), 2017-03-15

### Supplementary data

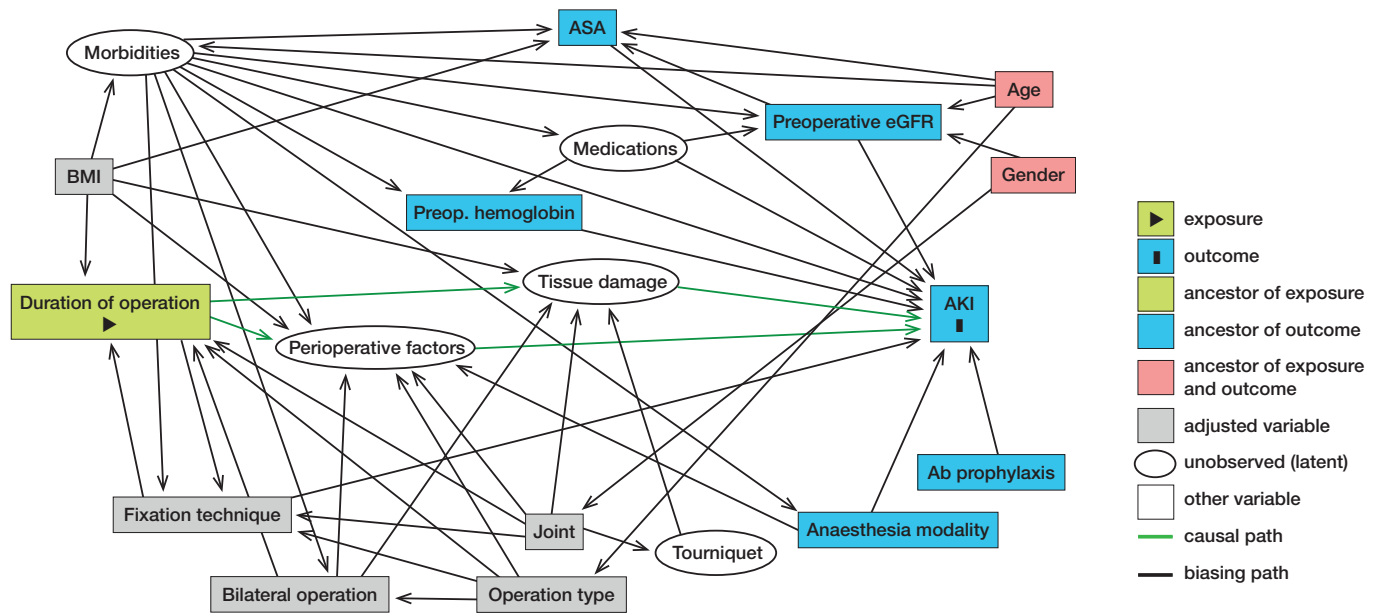

Directed acyclic graph.

Supplement: IORT_A_1301743_SM5816.pdf [file IORT_A_1301743_SM5816.pdf]
